# Supplementary material for: Isolation of mycobacteria from clinical samples collected in the United States from 2004 to 2011
Source: PubMed Central journal article supplement (PMC3654946; doi:10.1186/1746-6148-9-100), 2013-05-08
Supplement: 1746-6148-9-100-S1.pdf [file 1746-6148-9-100-S1.pdf]

Supplemental tables

Table 1: Mycobacterial Species Isolated between 1 Jan 2004 and 9 Aug 2011.

| Species                                | Count |
|----------------------------------------|-------|
| <i>Mycobacterium avium</i> complex     | 832   |
| <i>Mycobacterium bovis</i>             | 644   |
| <i>Mycobacterium fortuitum</i>         | 170   |
| <i>Mycobacterium smegmatis</i>         | 92    |
| <i>Mycobacterium fortuitum</i> complex | 56    |
| <i>Mycobacterium kansasii</i>          | 55    |
| <i>Mycobacterium terrae</i> complex    | 43    |
| <i>Mycobacterium tuberculosis</i>      | 42    |
| <i>Mycobacterium paratuberculosis</i>  | 35    |
| <i>Mycobacterium terrae</i>            | 31    |
| <i>Mycobacterium abscessus</i>         | 25    |
| <i>Mycobacterium nonchromogenicum</i>  | 23    |
| <i>Mycobacterium chelonae</i> complex  | 22    |
| <i>Mycobacterium pulveris</i>          | 22    |
| <i>Mycobacterium intermedium</i>       | 19    |
| <i>Mycobacterium marinum</i>           | 18    |
| <i>Mycobacterium asiaticum</i>         | 18    |
| <i>Mycobacterium simiae</i>            | 18    |
| <i>Mycobacterium chelonae</i>          | 17    |
| <i>Mycobacterium porcinum</i>          | 14    |
| <i>Mycobacterium thermoresistibile</i> | 11    |
| <i>Mycobacterium peregrinum</i>        | 11    |
| <i>Mycobacterium szulgai</i>           | 10    |
| <i>Mycobacterium shimoidei</i>         | 10    |
| <i>Mycobacterium lentiflavum</i>       | 7     |
| <i>Mycobacterium neoaurum</i>          | 6     |
| <i>Mycobacterium interjectum</i>       | 5     |
| <i>Mycobacterium vaccae</i>            | 5     |
| <i>Mycobacterium goodii</i>            | 4     |
| <i>Mycobacterium septicum</i>          | 4     |
| <i>Mycobacterium scrofulaceum</i>      | 3     |
| <i>Mycobacterium phlei</i>             | 3     |
| <i>Mycobacterium flavescens</i>        | 3     |
| <i>Mycobacterium monacense</i>         | 3     |
| <i>Mycobacterium gordonae</i>          | 3     |
| <i>Mycobacterium haemophilum</i>       | 3     |
| <i>Mycobacterium engbackii</i>         | 2     |
| <i>Mycobacterium ulcerans</i>          | 2     |
| <i>Mycobacterium gadium</i>            | 2     |
| <i>Mycobacterium triviale</i>          | 2     |
| <i>Mycobacterium genavense</i>         | 1     |
| <i>Mycobacterium triplex</i>           | 1     |
| <i>Mycobacterium duvalii</i>           | 1     |
| <i>Mycobacterium wolinskyi</i>         | 1     |

Continued...

| Species                                | Count |
|----------------------------------------|-------|
| <i>Mycobacterium paraffinicum</i>      | 1     |
| <i>Mycobacterium gilvum</i>            | 1     |
| <i>Mycobacterium smegmatis</i> complex | 1     |
| <i>Mycobacterium kubicae</i>           | 1     |
| <i>Mycobacterium holsaticum</i>        | 1     |
| <i>Mycobacterium palustre</i>          | 1     |
| <i>Mycobacterium alvei</i>             | 1     |
| <i>Mycobacterium nebraskense</i>       | 1     |
| <i>Mycobacterium marseillense</i>      | 1     |
| <i>Mycobacterium bolletii</i>          | 1     |
| <i>Mycobacterium gastri</i>            | 1     |

Table 2: Summary of mycobacteria isolated from tissues collected from species other than domestic cattle and deer from the United State between 1 Jan 2004 and 9 Aug 2011.

| Sample Origin | Mycobacterium                             | Count |
|---------------|-------------------------------------------|-------|
| Amphibia      | <i>Mycobacterium marinum</i>              | 9     |
|               | <i>Mycobacterium</i> species <sup>a</sup> | 3     |
|               | <i>Mycobacterium chelonae</i>             | 2     |
|               | <i>Mycobacterium ulcerans</i>             | 1     |
|               | <i>Mycobacterium avium</i> complex        | 1     |
|               | <i>Mycobacterium terrae</i>               | 1     |
|               | <i>Mycobacterium fortuitum</i>            | 1     |
|               | <i>Mycobacterium fortuitum</i> complex    | 1     |
|               | <i>Mycobacterium</i> species              | 1     |
| Aves          | <i>Mycobacterium avium</i> complex        | 69    |
|               | <i>Mycobacterium</i> species              | 10    |
|               | <i>Mycobacterium tuberculosis</i>         | 1     |
|               | <i>Mycobacterium fortuitum</i> complex    | 1     |
|               | <i>Mycobacterium tuberculosis</i> complex | 1     |
|               | <i>Mycobacterium genavense</i>            | 1     |
|               | <i>Mycobacterium pulveris</i>             | 1     |
|               | <i>Mycobacterium fortuitum</i>            | 1     |
|               | <i>Mycobacterium kansasii</i>             | 1     |
| Bison         | <i>Mycobacterium</i> species              | 10    |
|               | <i>Mycobacterium avium</i> complex        | 8     |
|               | <i>Mycobacterium pulveris</i>             | 3     |
|               | <i>Mycobacterium smegmatis</i>            | 1     |
|               | <i>Mycobacterium neoaurum</i>             | 1     |
| Camelidae     | <i>Mycobacterium avium</i> complex        | 2     |
|               | <i>Mycobacterium paratuberculosis</i>     | 1     |
| Canidae       | <i>Mycobacterium avium</i> complex        | 50    |
|               | <i>Mycobacterium bovis</i>                | 38    |
|               | <i>Mycobacterium</i> species              | 21    |
|               | <i>Mycobacterium abscessus</i>            | 7     |
|               | <i>Mycobacterium smegmatis</i>            | 3     |
|               | <i>Mycobacterium fortuitum</i>            | 3     |
|               | <i>Mycobacterium kansasii</i>             | 1     |
|               | <i>Mycobacterium interjectum</i>          | 1     |
|               | <i>Mycobacterium bolletii</i>             | 1     |
| Caprinae      | <i>Mycobacterium avium</i> complex        | 6     |
|               | <i>Mycobacterium kansasii</i>             | 3     |
|               | <i>Mycobacterium paratuberculosis</i>     | 3     |
|               | <i>Mycobacterium</i> species              | 1     |
| Cetacea       | <i>Mycobacterium</i> species              | 14    |

Continued...

| Sample Origin                 | Mycobacterium                      | Count |
|-------------------------------|------------------------------------|-------|
|                               | Mycobacterium bovis                | 8     |
|                               | Mycobacterium tuberculosis complex | 2     |
|                               | Mycobacterium avium complex        | 2     |
|                               | Mycobacterium neoaurum             | 1     |
|                               | Mycobacterium chelonae             | 1     |
|                               | Mycobacterium fortuitum complex    | 1     |
| Elephantidae                  | Mycobacterium species              | 46    |
|                               | Mycobacterium avium complex        | 27    |
|                               | Mycobacterium tuberculosis         | 14    |
|                               | Mycobacterium terrae               | 6     |
|                               | Mycobacterium szulgai              | 3     |
|                               | Mycobacterium fortuitum complex    | 2     |
|                               | Mycobacterium smegmatis            | 2     |
|                               | Mycobacterium septicum             | 1     |
|                               | Mycobacterium nonchromogenicum     | 1     |
|                               | Mycobacterium goodii               | 1     |
|                               | Mycobacterium monacense            | 1     |
|                               | Mycobacterium paraffinicum         | 1     |
|                               | Mycobacterium tuberculosis complex | 1     |
|                               | Mycobacterium fortuitum            | 1     |
| Equidae                       | Mycobacterium avium complex        | 2     |
|                               | Mycobacterium species              | 1     |
| Erinaceidae                   | Mycobacterium haemophilum          | 1     |
| Exotic Ruminants <sup>b</sup> | Mycobacterium avium complex        | 8     |
|                               | Mycobacterium kansasii             | 5     |
|                               | Mycobacterium simiae               | 1     |
|                               | Mycobacterium species              | 1     |
|                               | Mycobacterium fortuitum complex    | 1     |
| Felidae                       | Mycobacterium species              | 43    |
|                               | Mycobacterium avium complex        | 27    |
|                               | Mycobacterium smegmatis            | 26    |
|                               | Mycobacterium fortuitum            | 21    |
|                               | Mycobacterium fortuitum complex    | 8     |
|                               | Mycobacterium thermoresistibile    | 3     |
|                               | Mycobacterium chelonae complex     | 3     |
|                               | Mycobacterium abscessus            | 3     |
|                               | Mycobacterium goodii               | 1     |
|                               | Mycobacterium lentiflavum          | 1     |
|                               | Mycobacterium smegmatis complex    | 1     |
| Fish                          | Mycobacterium marinum              | 6     |
|                               | Mycobacterium species              | 5     |
|                               | Mycobacterium haemophilum          | 2     |
|                               | Mycobacterium lentiflavum          | 1     |

Continued...

| Sample Origin  | Mycobacterium                      | Count |
|----------------|------------------------------------|-------|
|                | Mycobacterium ulcerans             | 1     |
|                | Mycobacterium chelonae complex     | 1     |
|                | Mycobacterium chelonae             | 1     |
|                | Mycobacterium abscessus            | 1     |
| Giraffidae     | Mycobacterium avium complex        | 1     |
|                | Mycobacterium kansasii             | 1     |
| Leporidae      | Mycobacterium avium complex        | 1     |
| Macropodidae   | Mycobacterium avium complex        | 10    |
|                | Mycobacterium species              | 1     |
|                | Mycobacterium fortuitum            | 1     |
|                | Mycobacterium kansasii             | 1     |
| Mustelidae     | Mycobacterium kansasii             | 2     |
|                | Mycobacterium avium complex        | 1     |
| Pinnipedia     | Mycobacterium fortuitum            | 1     |
|                | Mycobacterium species              | 1     |
| Primate        | Mycobacterium tuberculosis         | 27    |
|                | Mycobacterium avium complex        | 14    |
|                | Mycobacterium species              | 12    |
|                | Mycobacterium kansasii             | 5     |
|                | Mycobacterium bovis                | 3     |
|                | Mycobacterium szulgai              | 3     |
|                | Mycobacterium peregrinum           | 2     |
|                | Mycobacterium marseillense         | 1     |
|                | Mycobacterium fortuitum complex    | 1     |
|                | Mycobacterium simiae               | 1     |
| Procyonidae    | Mycobacterium species              | 6     |
|                | Mycobacterium bovis                | 6     |
|                | Mycobacterium avium complex        | 5     |
|                | Mycobacterium tuberculosis complex | 2     |
|                | Mycobacterium terrae complex       | 1     |
|                | Mycobacterium smegmatis            | 1     |
| Reptilia       | Mycobacterium species              | 4     |
|                | Mycobacterium chelonae             | 3     |
|                | Mycobacterium chelonae complex     | 3     |
|                | Mycobacterium avium complex        | 2     |
|                | Mycobacterium abscessus            | 2     |
|                | Mycobacterium fortuitum            | 2     |
|                | Mycobacterium szulgai              | 1     |
| Rhinocerotidae | Mycobacterium fortuitum complex    | 1     |

Continued...

| Sample Origin               | Mycobacterium                      | Count                  |
|-----------------------------|------------------------------------|------------------------|
| Serpentes                   | Mycobacterium chelonae complex     | 5                      |
|                             | Mycobacterium abscessus            | 3                      |
|                             | Mycobacterium chelonae             | 3                      |
|                             | Mycobacterium gordonae             | 2                      |
|                             | Mycobacterium marinum              | 2                      |
|                             | Mycobacterium species              | 2                      |
|                             | Mycobacterium fortuitum            | 2                      |
|                             | Mycobacterium avium complex        | 1                      |
|                             | Mycobacterium fortuitum complex    | 1                      |
| Suidae                      | Mycobacterium avium complex        | 176                    |
|                             | Mycobacterium species              | 80                     |
|                             | Mycobacterium asiaticum            | 12                     |
|                             | Mycobacterium bovis                | 10                     |
|                             | Mycobacterium terrae               | 5                      |
|                             | Mycobacterium fortuitum            | 4                      |
|                             | Mycobacterium fortuitum complex    | 3                      |
|                             | Mycobacterium terrae complex       | 3                      |
|                             | Mycobacterium tuberculosis complex | 2                      |
|                             | Mycobacterium nonchromogenicum     | 1                      |
|                             | Mycobacterium vaccae               | 1                      |
|                             | Mycobacterium neoaurum             | 1                      |
|                             | Tapiridae                          | Mycobacterium gordonae |
| Mycobacterium avium complex |                                    | 1                      |
| Testudinidae                | Mycobacterium avium complex        | 7                      |
|                             | Mycobacterium chelonae complex     | 3                      |
|                             | Mycobacterium species              | 3                      |
|                             | Mycobacterium fortuitum            | 2                      |
|                             | Mycobacterium marinum              | 1                      |
|                             | Mycobacterium gilvum               | 1                      |
|                             | Mycobacterium chelonae             | 1                      |
| Unkown Marine               | Mycobacterium chelonae             | 5                      |
|                             | Mycobacterium chelonae complex     | 4                      |
|                             | Mycobacterium fortuitum complex    | 1                      |
|                             | Mycobacterium fortuitum            | 1                      |
| Unknown                     | Mycobacterium phlei                | 1                      |
|                             | Mycobacterium avium complex        | 1                      |
| Unspecified Zoo Animal      | Mycobacterium avium complex        | 2                      |
|                             | Mycobacterium shimoidei            | 1                      |
|                             | Mycobacterium chelonae             | 1                      |

<sup>a</sup> Isolate was identified as mycobacteria but were not further speciated.

<sup>b</sup> Ruminants other than domestic cattle and cervids listed in Table 6
